# Supplementary material for: Low levels of nitryl chloride: Nocturnal nitrogen oxides in the Lower Fraser Valley of British Columbia
Source: Copernicus journal article supplement (doi:10.5194/acp-2017-1027), 2017-12-22
Supplement: Supplementary file 1 [file acp-2017-1027-supplement.pdf]

1 **Supplemental information for**

2 **Low levels of nitryl chloride: Nocturnal nitrogen oxides in**  
3 **the Lower Fraser Valley of British Columbia**

4 **H. D. Osthoff<sup>1</sup>, C. A. Odame-Ankrah<sup>1</sup>, Y. M. Taha<sup>1</sup>, T. W. Tokarek<sup>1</sup>, C. L. Schiller<sup>2</sup>,**  
5 **D. Haga<sup>3</sup>, K. Jones<sup>2</sup>, and R. Vingarzan<sup>2</sup>**

6 [1] {Department of Chemistry, University of Calgary, Calgary, Alberta T2N 1N4,  
7 Canada}

8 [2] {Science Division, Meteorological Service of Canada, Environment and Climate  
9 Change Canada, Vancouver, British Columbia V6C 3S5, Canada}

10 [3] {British Columbia Ministry of Environment and Climate Change Strategy,  
11 Cranbrook, British Columbia V1C 7G5, Canada}

12

13 Correspondence to: H. D. Osthoff (hosthoff@ucalgary.ca)

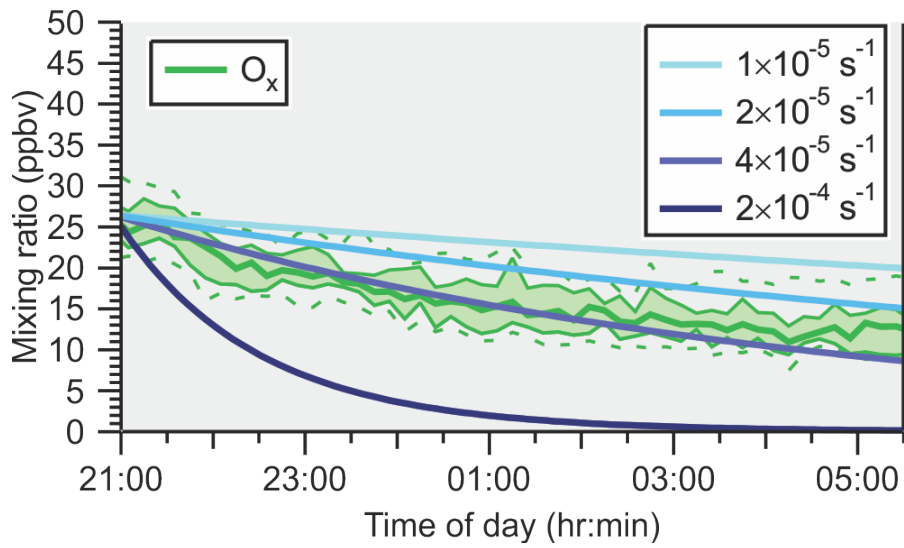

14

15 **Figure S-1.** Observed and simulated  $O_x$  loss in the NBL at Abbotsford assuming  $O_3$  dry  
 16 deposition rates of  $2 \times 10^{-4} \text{ s}^{-1}$ ,  $4 \times 10^{-5} \text{ s}^{-1}$ ,  $2 \times 10^{-5} \text{ s}^{-1}$  and  $1 \times 10^{-5} \text{ s}^{-1}$ , corresponding to approximate  
 17 mixing heights of 10 m, 50 m, 100 m, and 200 m.

18 **Table S-1.** Volatile organic compounds quantified by GC-MS

|                        |                        |                       |
|------------------------|------------------------|-----------------------|
| Butane, 2-methyl-      | Cyclohexane, methyl-   | Benzene, 1,2,3-       |
| 1-Pentene              | Pentane, 2,3,4-        | trimethyl-            |
| Pentane                | trimethyl-             | Benzene, 1,3-diethyl- |
| 2-Pentene (Z) (cis)    | Heptane, 2-methyl-     | Benzene, 1,4-diethyl- |
| Isoprene (1,3-         | Heptane, 3-methyl-     | Undecane              |
| Butadiene, 2-methyl-)  | Toluene                | Dodecane              |
| 2-Pentene (E) (trans)  | Octane                 | Ethylene              |
| Butane, 2,2-dimethyl-  | Ethylbenzene           | Acetylene             |
| Cyclopentane           | m & p-Xylene           | Ethane                |
| 2,3-Dimethylbutane     | Nonane                 | Propane               |
| Pentane, 2-methyl-     | Styrene                | Propylene             |
| Pentane, 3-methyl-     | o-Xylene               | Isobutane             |
| 1-Hexene               | Isopropyl Benzene      | 1-Butene              |
| Hexane                 | (Benzene, (1-methyleth | Butane                |
| Cyclopentane, methyl-  | Benzene, propyl-       | 2-Butene (trans)      |
| Pentane, 2,4-dimethyl- | Benzene, 1-ethyl-3-    | 2-Butene (cis)        |
| Cyclohexane            | methyl-                | Freon 11              |
| Hexane, 2-methyl-      | Benzene, 1-ethyl-4-    | (Trichloromonofluorom |
| Benzene                | methyl-                | ethane)               |
| 2,3-Dimethylpentane    | Benzene, 1,3,5-        | Isopropyl Alcohol     |
| Hexane, 3-methyl-      | trimethyl-             | Acetone               |
| Pentane, 2,2,4-        | Decane                 | Ethene, 1,1-dichloro- |
| trimethyl-             | Benzene, 1-ethyl-2-    | Methylene Chloride    |
| Heptane                | methyl-                | Freon 113 (Ethane,    |
|                        | Benzene, 1,2,4-        | 1,1,2-trichloro-1,2,2 |
|                        | trimethyl-             |                       |

|                                             |                                    |                                           |
|---------------------------------------------|------------------------------------|-------------------------------------------|
| Carbon disulfide                            | Methyl Methacrylate                | Benzene, 1,4-dichloro-                    |
| Ethene, 1,2-dichloro-,<br>(E)-              | 1-Propene, 1,3-<br>dichloro-, (Z)- | Benzene, 1,2-dichloro-                    |
| Methyl tertbutylether<br>(Propane, 2-methox | Methyl Isobutyl Ketone             | Benzene, 1,2,4-<br>trichloro-             |
| Ethane, 1,1-dichloro-                       | 1-Propene, 1,3-<br>dichloro-, (E)- | 1,3-Butadiene,<br>1,1,2,3,4,4-hexachloro- |
| Vinyl Acetate (Acetic<br>acid ethenyl ester | Ethane, 1,1,2-trichloro-           | Naphthalene                               |
| 2-Butanone                                  | 2-Hexanone                         | Freon 12                                  |
| Chloroform<br>(Trichloromethane)            | Methane,<br>dibromochloro-         | Chloromethane                             |
| Ethyl Acetate                               | Ethane, 1,2-dibromo-               | Freon 114                                 |
| Furan, tetrahydro-                          | Tetrachloroethylene                | Vinyl chloride                            |
| Ethane, 1,2-dichloro-                       | Benzene, chloro-                   | 1,3 Butadiene                             |
| Ethane, 1,1,1-trichloro-                    | Bromoform (Methane,<br>tribromo-)  | Bromomethane                              |
| Carbon Tetrachloride                        | Ethane, 1,1,2,2-<br>tetrachloro-   | Chloroethane                              |
| Trichloroethylene                           | Ethane, pentachloro-               | Ethanol                                   |
| Methane,<br>bromodichloro-                  | Benzyl Chloride                    | 1R-alpha-Pinene                           |
| 1,4-Dioxane                                 | Benzene, 1,3-dichloro-             | Camphene                                  |
|                                             |                                    | beta-Pinene                               |
|                                             |                                    | D-Limonene                                |
